# Supplementary material
Source: Springer Nature journal article supplement (https://www.springermedizin.de/resource/supplementary/12885_2013_4394_MOESM9_ESM.pdf/9466188)

**A**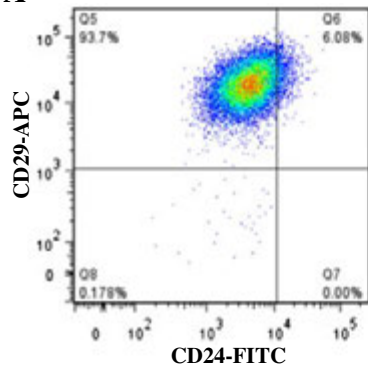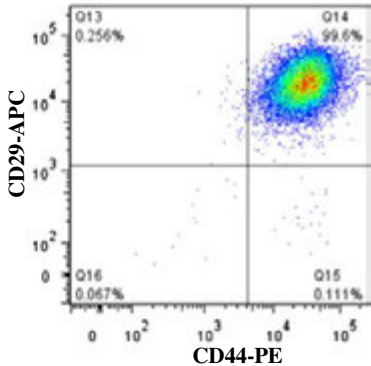**B**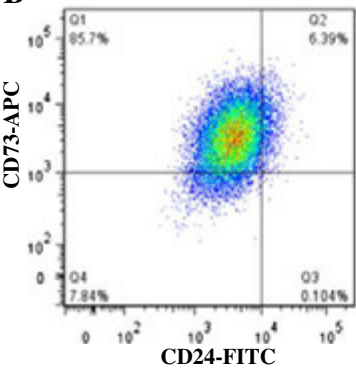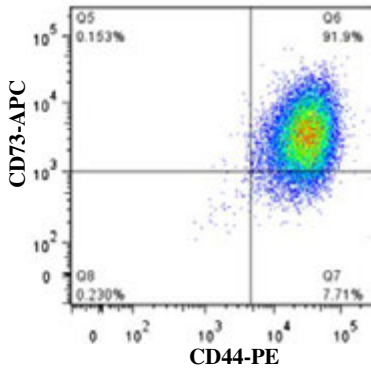

Supplement: MOESM9 [file 9466188]
